# Supplementary material
Source: PubMed Central journal article supplement (PMC4019399)
Supplement: NIHMS559922-supplement-Appendix_1.pdf [file NIHMS559922-supplement-Appendix_1.pdf]

## Appendix 1. Diagnostic criteria for HIV-Associated Neurocognitive Disorders.

|                                                                    |                                                                                                                                                                                                      |
|--------------------------------------------------------------------|------------------------------------------------------------------------------------------------------------------------------------------------------------------------------------------------------|
| HIV-associated Asymptomatic Neurocognitive Impairment <sup>1</sup> | A. Acquired impairment in cognitive functioning with scores at least 1 standard deviation below the mean in at least two cognitive domains<br>B. Does not interfere with everyday functioning        |
| HIV-associated Mild Neurocognitive Disorder <sup>1</sup>           | A. Acquired impairment in cognitive functioning with scores at least 1 standard deviation below the mean in at least two cognitive domains<br>B. Mild interference in daily functioning              |
| HIV-associated Dementia <sup>1</sup>                               | A. Marked acquired impairment in cognitive functioning with scores at least 2 standard deviations below the mean in at least 2 cognitive domains<br>B. Marked interference in day-to-day functioning |

\* Other criteria include: (1) Does not meet criteria for delirium or dementia; (2) No evidence of pre-existing causes.

### Reference

1. Antinori A, Arendt G, Becker J, Brew B, Byrd D, Cherner M, et al. Updated research nosology for HIV-associated neurocognitive disorders. *Neurology*. 2007;69:1789-99.
