# Supplementary material
Source: PubMed Central journal article supplement (PMC4019399)

**Appendix 2.** The proportion of a normal population theoretically expected to have scores below certain threshold Z-scores on a single test assuming a normal distribution.

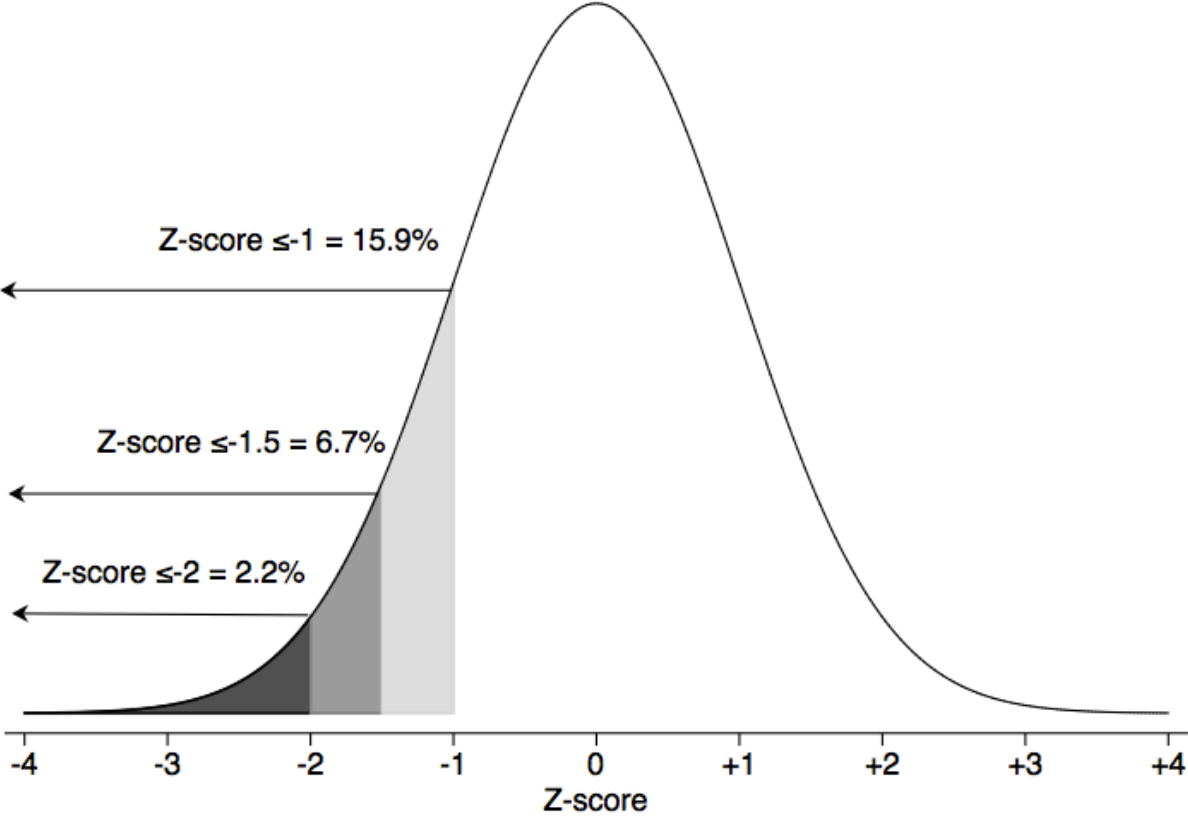

Supplement: NIHMS559922-supplement-Appendix_2.pdf [file NIHMS559922-supplement-Appendix_2.pdf]
