# Supplementary material
Source: PubMed Central journal article supplement (PMC4019399)
Supplement: NIHMS559922-supplement-Appendix_3.pdf [file NIHMS559922-supplement-Appendix_3.pdf]

### Appendix 3. Summary of formulas used for the calculation of bias and effective sample size.

Summarized from Bross I. Misclassification in 2 x 2 tables. International Biometric Society 1954;10:478-486.

#### Bias in Prevalence Estimate

*Let:*

**n**= number of individuals drawn from population

**u**= actual number of “problem” cases in sample (true positives=people with HAND, classified as having HAND)

**v**= number of “problem” individuals incorrectly classified as “non-problem” cases (false negatives=people with HAND, classified as no HAND)

**w**= number of “non-problem” individuals who are incorrectly classified as “problem” cases (false positives)

**x**= apparent number of problem individuals

*Therefore:*

$$x = u - v + w$$

*Let:*

**p** = proportion of “problem” cases in the population; true prevalence

**q** = is the proportion of “non-problem” cases

**θ** = probability of misclassifying a “problem” individual, e.g. false negatives

**φ** = probability of misclassifying a “non-problem” individual, e.g. false positives

*If misclassification exists, the estimated proportion of “problem” cases will not be p as above but instead:*

$$E(x/n) = p - p\theta + q\phi \quad \text{where } q = (1-p)$$

*Then:*

$$E(x) = n p K \quad \text{where } K = 1 - \theta + q/p (\phi)$$

*Thus:*

$$\text{Estimated prevalence} = E(x/n) = p K$$

*And:*

$$\text{Bias in prevalence estimate} = p K - p$$

#### Effective sample size

*The quantity K' measures the effect of misclassification on the variance of the estimate p where:*

$$K' = 1 - 2\phi - 2\theta + \theta/q + \phi/p$$

*The accepted measure of efficiency is:*

$$\text{Efficiency} = 1/(K' + D) \quad \text{where } D = [(q\phi - p\theta)^2 n]/pq$$

*And an accepted measure of effective sample size is:*

$$\text{Effective sample size} = n * \text{efficiency}$$
