# Supplementary material
Source: PubMed Central journal article supplement (PMC4019399)
Supplement: NIHMS559922-supplement-Appendix_4.pdf [file NIHMS559922-supplement-Appendix_4.pdf]

## Appendix 4. Tables underlying Figures 2 and 3.

**Table 1.** The proportion of a young Kenyan HIV-uninfected population who meet criteria for cognitive impairment using various definitions of impairment and various criteria for an abnormal domain (n=84).

|                                         | Z-scores $\leq -1$ in $\geq 2$ domains | Z-scores $\leq -1.5$ in $\geq 2$ domains | Z-scores $\leq -2$ in $\geq 2$ domains |
|-----------------------------------------|----------------------------------------|------------------------------------------|----------------------------------------|
| <i>Criteria for an abnormal domain:</i> | % [95%CI]                              | % [95%CI]                                | % [95%CI]                              |
| One test in domain abnormal             | 48%<br>[37%, 59%]                      | 20%<br>[11%, 29%]                        | 6%<br>[1%, 11%]                        |
| Average score in domain abnormal        | 20%<br>[11%, 29%]                      | 6%<br>[1%, 11%]                          | 0%                                     |
| At least two tests in domain abnormal   | 19%<br>[10%, 28%]                      | 4%<br>[-0.5%, 8%]                        | 0%                                     |
| All tests in domain abnormal            | 8%<br>[2%, 14%]                        | 1%<br>[-1%, 4%]                          | 0%                                     |

**Table 2.** The percentage of a simulated normal population who meet criteria for cognitive impairment using various definitions of impairment and various criteria for an abnormal domain.

| <i>Criteria for an abnormal domain:</i> | Z-scores $\leq -1$ in $\geq 2$ domains |     |     |      | Z-scores $\leq -1.5$ in $\geq 2$ domains |     |     |      | Z-scores $\leq -2$ in $\geq 2$ domains |     |     |      |
|-----------------------------------------|----------------------------------------|-----|-----|------|------------------------------------------|-----|-----|------|----------------------------------------|-----|-----|------|
|                                         | Emp                                    | Low | Mod | High | Emp                                      | Low | Mod | High | Emp                                    | Low | Mod | High |
| One test in domain abnormal             | 56                                     | 74  | 45  | 27   | 24                                       | 29  | 22  | 13   | 7                                      | 5   | 8   | 5    |
| Average score in domain abnormal        | 30                                     | 31  | 25  | 20   | 11                                       | 7   | 11  | 9    | 3                                      | 1   | 4   | 3    |
| At least two tests in domain abnormal   | 11                                     | 4   | 15  | 17   | 2                                        | 0   | 5   | 7    | 0                                      | 0   | 1   | 2    |
| All tests in domain abnormal            | 8                                      | 2   | 11  | 15   | 1                                        | 0   | 3   | 6    | 0                                      | 0   | 1   | 2    |

**Table 3.** The percentage of a simulated normal population who meet criteria for cognitive impairment using neuropsychological test batteries of various sizes.

| Number of Domains      | Empiric Correlation<br>(Within 0.31, Between 0.17) |         |         |         | Moderate Correlation<br>(Within 0.5, Between 0.5) |         |         |         |
|------------------------|----------------------------------------------------|---------|---------|---------|---------------------------------------------------|---------|---------|---------|
|                        | 2 tests                                            | 3 tests | 4 tests | 5 tests | 2 tests                                           | 3 tests | 4 tests | 5 tests |
| <b><i>Z</i> ≤ -1</b>   |                                                    |         |         |         |                                                   |         |         |         |
| 2                      | 4                                                  | 5       | 5       | 5       | 8                                                 | 9       | 10      | 10      |
| 3                      | 10                                                 | 10      | 11      | 11      | 14                                                | 14      | 14      | 15      |
| 4                      | 15                                                 | 16      | 16      | 16      | 17                                                | 18      | 18      | 18      |
| 5                      | 21                                                 | 21      | 21      | 21      | 21                                                | 20      | 20      | 20      |
| 6                      | 26                                                 | 25      | 25      | 25      | 23                                                | 23      | 22      | 22      |
| 7                      | 30                                                 | 30      | 29      | 29      | 26                                                | 25      | 24      | 23      |
| 8                      | 34                                                 | 34      | 33      | 32      | 28                                                | 26      | 25      | 24      |
| 9                      | 38                                                 | 37      | 36      | 36      | 30                                                | 27      | 26      | 25      |
| 10                     | 41                                                 | 40      | 39      | 38      | 31                                                | 29      | 27      | 26      |
| <b><i>Z</i> ≤ -1.5</b> |                                                    |         |         |         |                                                   |         |         |         |
| 2                      | 1                                                  | 1       | 1       | 1       | 3                                                 | 3       | 3       | 4       |
| 3                      | 3                                                  | 3       | 3       | 3       | 5                                                 | 5       | 6       | 6       |
| 4                      | 4                                                  | 5       | 5       | 5       | 7                                                 | 7       | 7       | 7       |
| 5                      | 6                                                  | 7       | 7       | 7       | 9                                                 | 8       | 8       | 8       |
| 6                      | 8                                                  | 9       | 9       | 9       | 10                                                | 10      | 9       | 9       |
| 7                      | 10                                                 | 11      | 11      | 11      | 11                                                | 11      | 10      | 10      |
| 8                      | 12                                                 | 13      | 13      | 13      | 12                                                | 12      | 11      | 11      |
| 9                      | 14                                                 | 14      | 15      | 15      | 13                                                | 12      | 12      | 12      |
| 10                     | 16                                                 | 16      | 16      | 16      | 14                                                | 13      | 13      | 12      |
| <b><i>Z</i> ≤ -2</b>   |                                                    |         |         |         |                                                   |         |         |         |
| 2                      | 0                                                  | 0       | 0       | 0       | 1                                                 | 1       | 1       | 1       |
| 3                      | 0                                                  | 1       | 1       | 1       | 1                                                 | 2       | 2       | 2       |
| 4                      | 1                                                  | 1       | 1       | 1       | 2                                                 | 2       | 2       | 2       |
| 5                      | 1                                                  | 2       | 2       | 2       | 3                                                 | 3       | 3       | 3       |
| 6                      | 2                                                  | 2       | 2       | 2       | 3                                                 | 3       | 3       | 3       |
| 7                      | 2                                                  | 3       | 3       | 3       | 4                                                 | 4       | 3       | 3       |
| 8                      | 3                                                  | 3       | 3       | 3       | 4                                                 | 4       | 4       | 4       |
| 9                      | 3                                                  | 4       | 4       | 4       | 5                                                 | 4       | 4       | 4       |
| 10                     | 4                                                  | 4       | 4       | 5       | 5                                                 | 5       | 4       | 4       |
