# Supplementary material
Source: PubMed Central journal article supplement (PMC4019399)
Supplement: NIHMS559922-supplement-Appendix_5.pdf [file NIHMS559922-supplement-Appendix_5.pdf]

## Appendix 5. Tables supporting Figures 3 and 4.

**Table 1.** Bias in prevalence estimate as a function of the false positive rate and true prevalence of disease (selected values only).\*

| True Prevalence | False Positive Rate | Estimated Prevalence | Bias in prevalence estimate |
|-----------------|---------------------|----------------------|-----------------------------|
| 0.02            | 0.01                | 0.03                 | 0.01                        |
|                 | 0.05                | 0.07                 | 0.05                        |
|                 | 0.1                 | 0.12                 | 0.10                        |
|                 | 0.2                 | 0.22                 | 0.20                        |
|                 | 0.4                 | 0.41                 | 0.39                        |
| 0.1             | 0.01                | 0.10                 | 0.00                        |
|                 | 0.05                | 0.14                 | 0.04                        |
|                 | 0.1                 | 0.19                 | 0.09                        |
|                 | 0.2                 | 0.28                 | 0.18                        |
|                 | 0.4                 | 0.46                 | 0.36                        |
| 0.25            | 0.01                | 0.25                 | -0.01                       |
|                 | 0.05                | 0.28                 | 0.03                        |
|                 | 0.1                 | 0.31                 | 0.06                        |
|                 | 0.2                 | 0.39                 | 0.14                        |
|                 | 0.4                 | 0.54                 | 0.29                        |
| 0.4             | 0.01                | 0.39                 | -0.01                       |
|                 | 0.05                | 0.41                 | 0.01                        |
|                 | 0.1                 | 0.44                 | 0.04                        |
|                 | 0.2                 | 0.50                 | 0.10                        |
|                 | 0.4                 | 0.62                 | 0.22                        |

\* Assumes false negative rate of 0.05.

**Table 2.** Effective sample size as a function of the false positive rate, true prevalence of disease and sample size (selected values only).\*

| Actual Sample Size (n=100) |                     |                       | Actual Sample Size (n=1000) |                     |                       |
|----------------------------|---------------------|-----------------------|-----------------------------|---------------------|-----------------------|
| Prevalence                 | False positive rate | Effective sample size | Prevalence                  | False positive rate | Effective sample size |
| <b>0.02</b>                | 0.01                | 55                    | <b>0.02</b>                 | 0.01                | 186                   |
|                            | 0.05                | 7                     |                             | 0.05                | 8                     |
|                            | 0.1                 | 2                     |                             | 0.1                 | 2                     |
|                            | 0.2                 | 0                     |                             | 0.2                 | 1                     |
|                            | 0.4                 | 0                     |                             | 0.4                 | 0                     |
| <b>0.1</b>                 | 0.01                | 95                    | <b>0.1</b>                  | 0.01                | 824                   |
|                            | 0.05                | 32                    |                             | 0.05                | 52                    |
|                            | 0.1                 | 10                    |                             | 0.1                 | 12                    |
|                            | 0.2                 | 3                     |                             | 0.2                 | 3                     |
|                            | 0.4                 | 1                     |                             | 0.4                 | 1                     |
| <b>0.25</b>                | 0.01                | 100                   | <b>0.25</b>                 | 0.01                | 893                   |
|                            | 0.05                | 72                    |                             | 0.05                | 227                   |
|                            | 0.1                 | 31                    |                             | 0.1                 | 45                    |
|                            | 0.2                 | 9                     |                             | 0.2                 | 10                    |
|                            | 0.4                 | 2                     |                             | 0.4                 | 2                     |
| <b>0.4</b>                 | 0.01                | 94                    | <b>0.4</b>                  | 0.01                | 554                   |
|                            | 0.05                | 95                    |                             | 0.05                | 702                   |
|                            | 0.1                 | 59                    |                             | 0.1                 | 130                   |
|                            | 0.2                 | 19                    |                             | 0.2                 | 23                    |
|                            | 0.4                 | 5                     |                             | 0.4                 | 5                     |
